# Supplementary material for: Galectin-3, a novel endogenous TREM2 ligand, detrimentally regulates inflammatory response in Alzheimer’s disease
Source: Springer Nature journal article supplement (doi:10.1007/s00401-019-02013-z), 2019-04-20

# Suppl. Fig. 1

## Gal3 protein expression

**a**

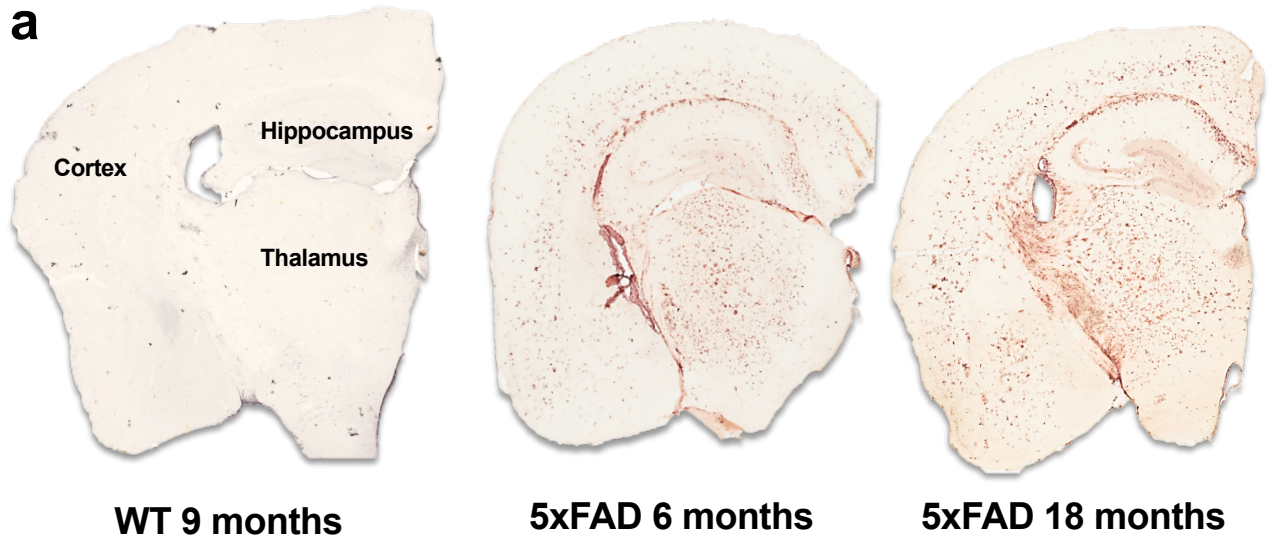

10 weeks (early plaque)  
old 5xFAD mice

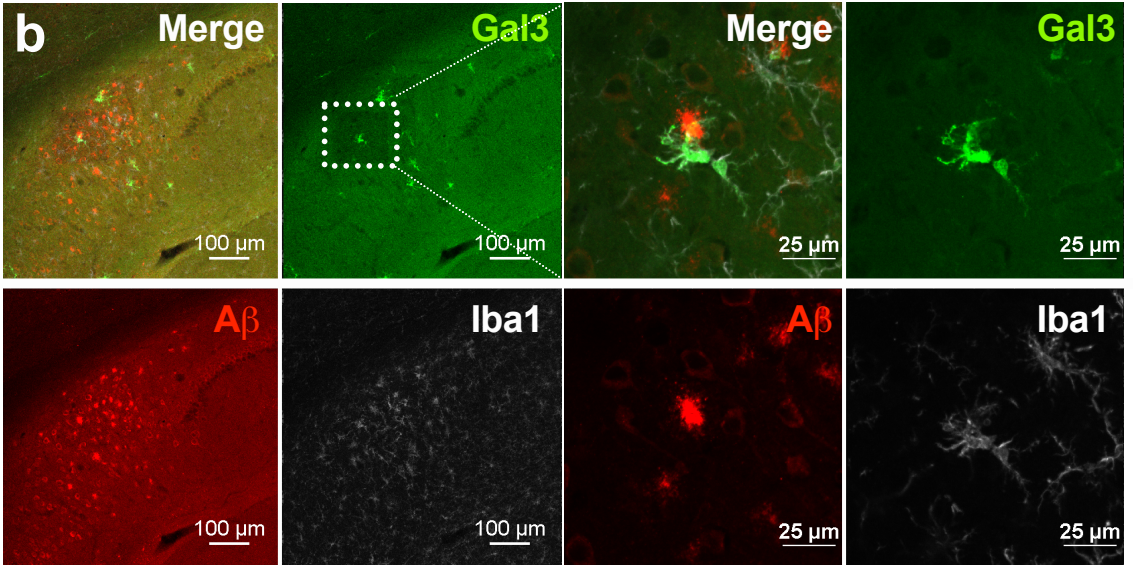

6 weeks (pre plaque)  
old 5xFAD mice

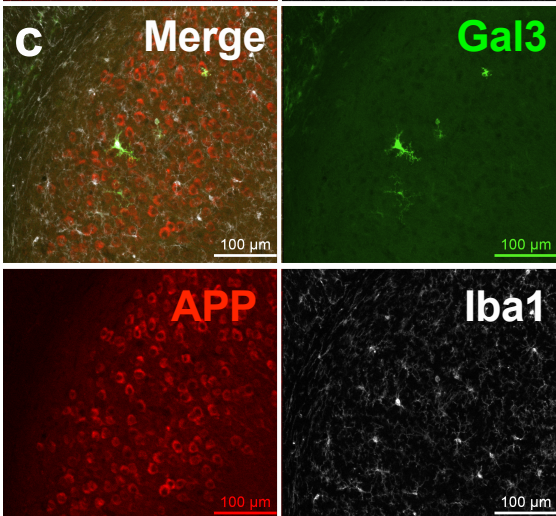

Supplement: MOESM1 [file 16666668]
