# Supplementary material for: Galectin-3, a novel endogenous TREM2 ligand, detrimentally regulates inflammatory response in Alzheimer’s disease
Source: Springer Nature journal article supplement (doi:10.1007/s00401-019-02013-z), 2019-04-20

# Suppl. Fig. 6

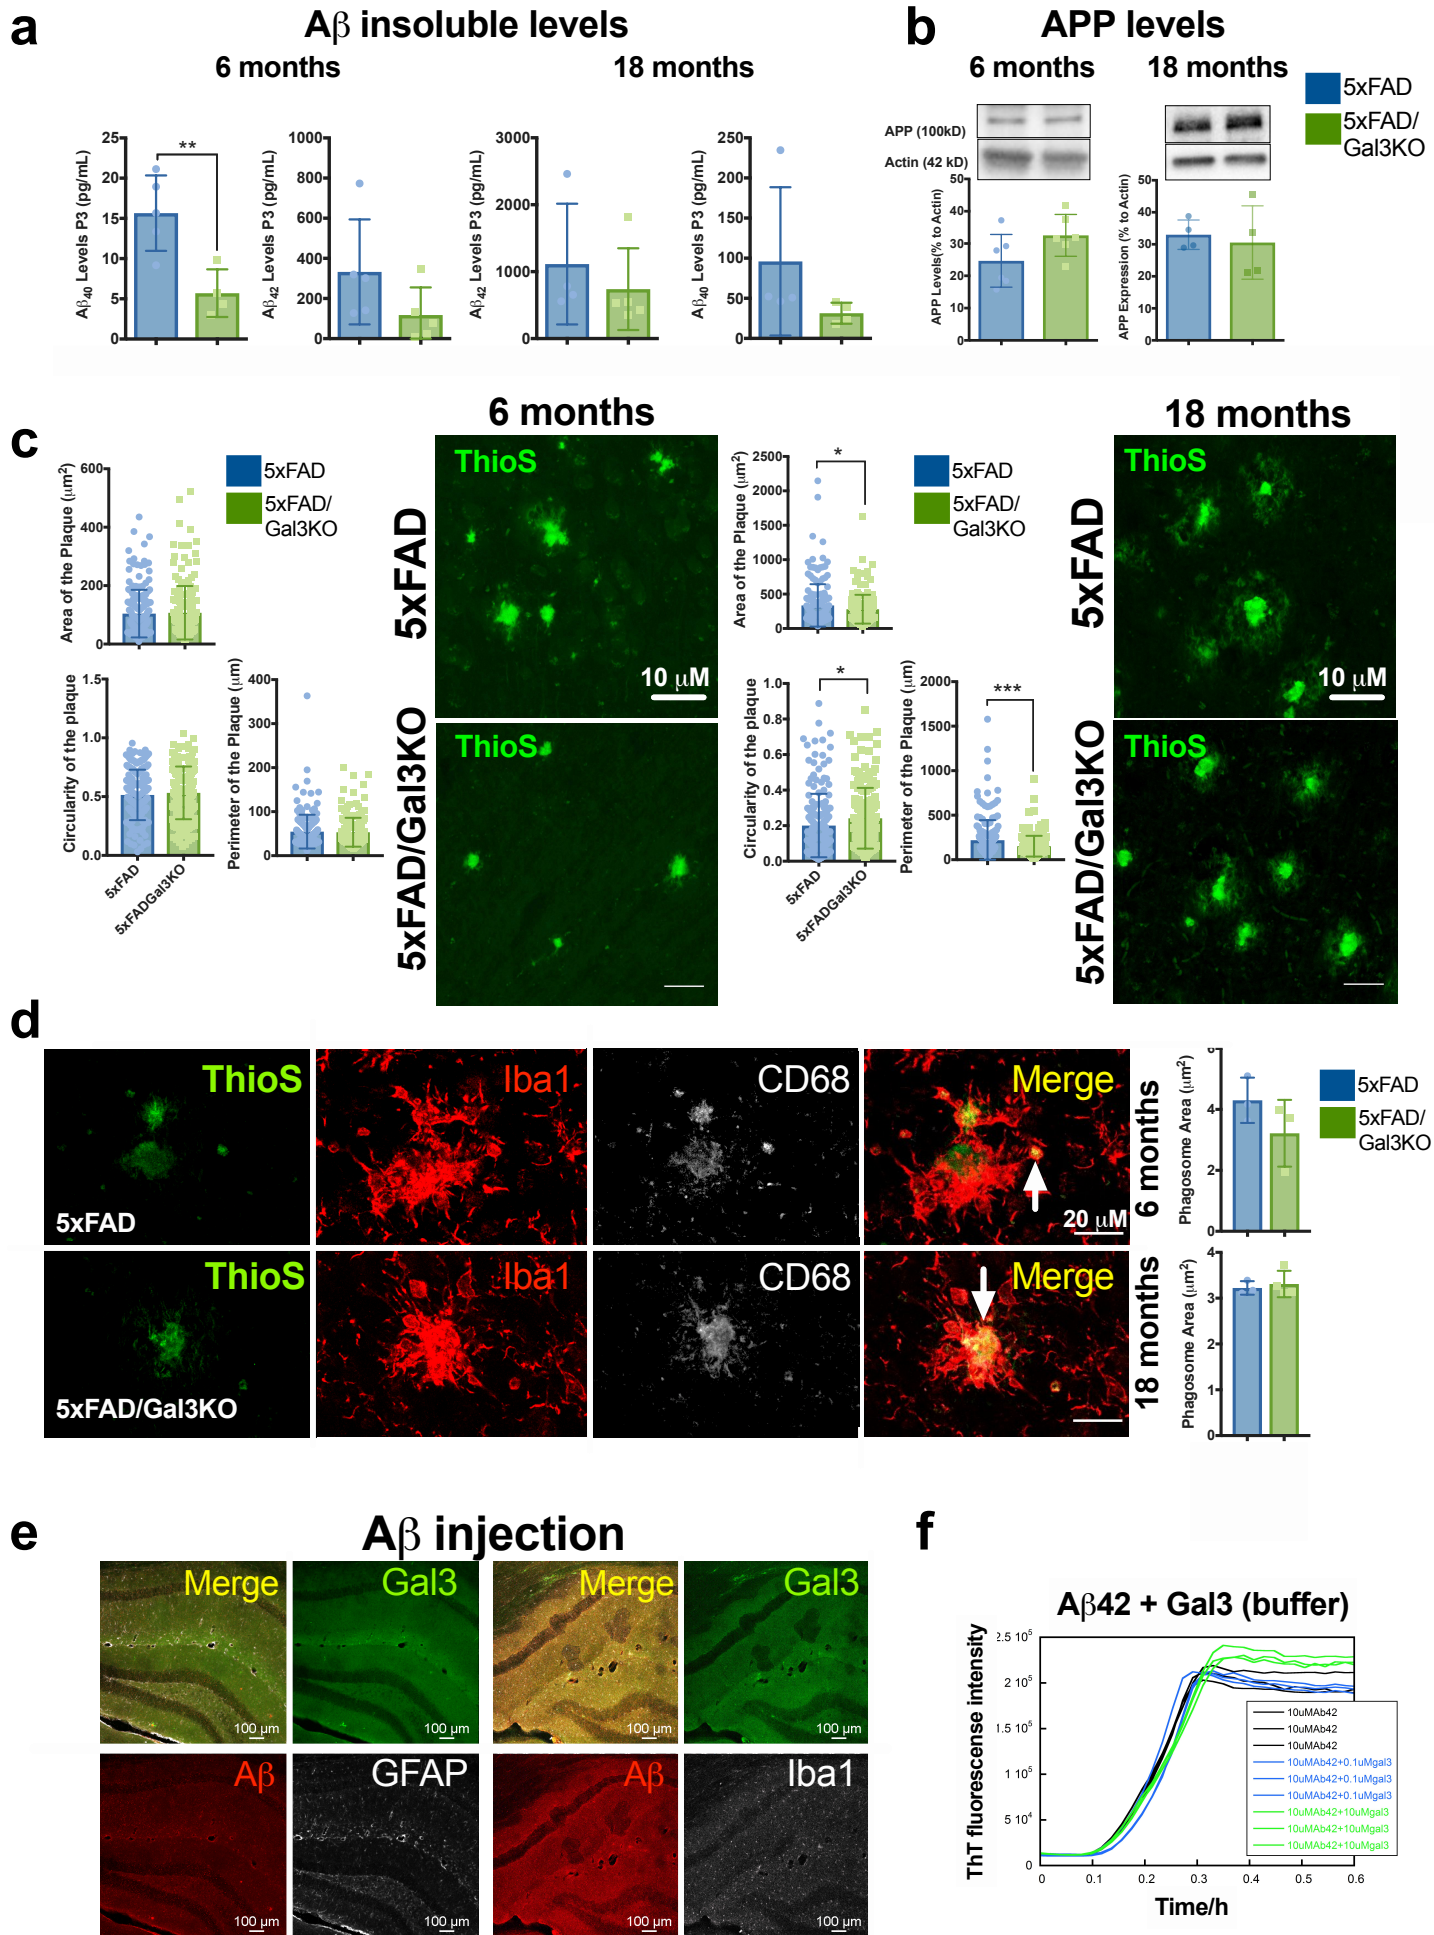

Supplement: MOESM6 [file 16666668]
