# Supplementary material for: Galectin-3, a novel endogenous TREM2 ligand, detrimentally regulates inflammatory response in Alzheimer’s disease
Source: Springer Nature journal article supplement (doi:10.1007/s00401-019-02013-z), 2019-04-20
Supplement: MOESM7 [file 16666668]

# Suppl. Fig. 7

**a**

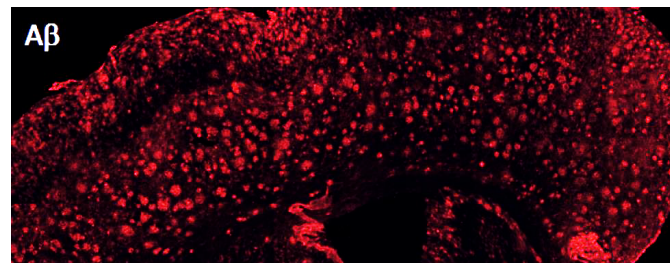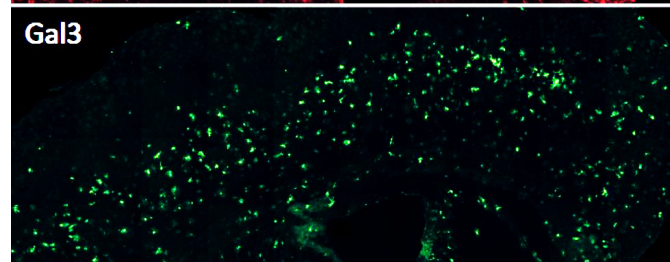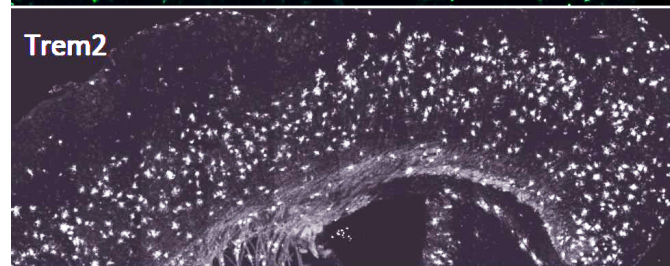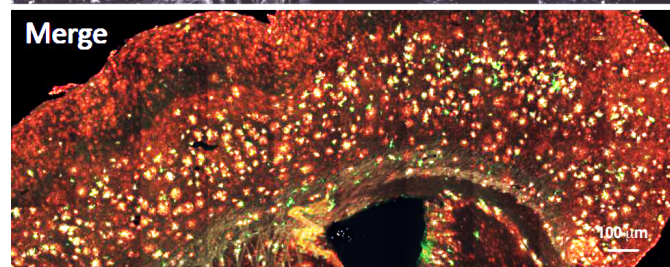

**b**

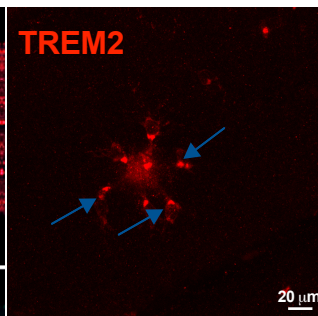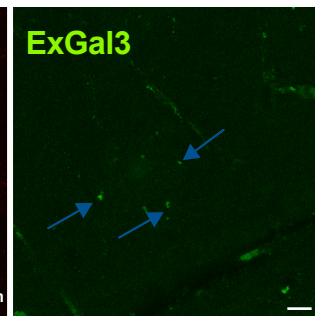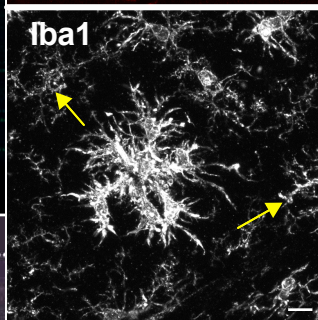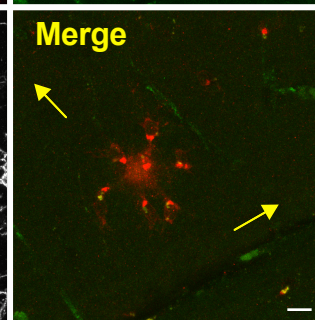

**c**

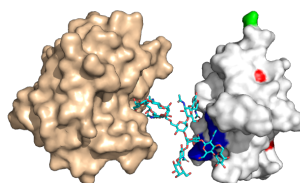

**Galectin-3 TREM-2 Interaction**

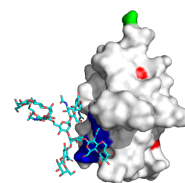

**TREM-2 Interaction**
