# Supplementary material for: Galectin-3, a novel endogenous TREM2 ligand, detrimentally regulates inflammatory response in Alzheimer’s disease
Source: Springer Nature journal article supplement (doi:10.1007/s00401-019-02013-z), 2019-04-20
Supplement: MOESM8 [file 16666668]

**Table 1. AD subjects and healthy controls used to evaluate the role of galectin-3 in Alzheimer's disease.**

| <u>Case</u>       | <u>Sex</u> | <u>Age (years)</u> | <u>Post Mortem Time</u> | <u>Cause of Death</u>                            | <u>CNS Diagnose</u>                   |
|-------------------|------------|--------------------|-------------------------|--------------------------------------------------|---------------------------------------|
| Healthy Control 1 | Male       | 80                 | 5h 25min                | Euthanasia (colon carcinoma)                     | -                                     |
| Healthy Control 2 | Female     | 68                 | 6h 50min                | Euthanasia (metastatic ovarian cancer and ileus) | -                                     |
| Healthy Control 3 | Male       | 65                 | 9h 10min                | Euthanasia (heart failure)                       | -                                     |
| AD Patient 1      | Female     | 64                 | 5h 15 min               | Pneumonia and stomach bleeding                   | Alzheimer's Disease                   |
| AD Patient 2      | Male       | 64                 | 8h 15 min               | Euthanasia (AD with Lewy's bodies)               | Alzheimer's Disease with Lewis Bodies |
| AD Patient 3      | Female     | 72                 | 4h 25 min               | Advanced Alzheimer's with delirium               | Advanced Alzheimer's with delirium    |
| AD Patient 4      | Male       | 64                 | 6h 40 min               | Dehydration after CVA and AD                     | Alzheimer's Disease                   |

Patients and healthy controls used to evaluate the presence of Gal3 in the vicinity of the senile plaques by immunohistochemistry.
