# Supplementary material for: Galectin-3, a novel endogenous TREM2 ligand, detrimentally regulates inflammatory response in Alzheimer’s disease
Source: Springer Nature journal article supplement (doi:10.1007/s00401-019-02013-z), 2019-04-20
Supplement: MOESM9 [file 16666668]

**Table 2. AD subjects and healthy controls used to evaluate the role of galectin-3 in Alzheimer's disease.**

| <u>Case</u>       | <u>Sex</u> | <u>Age (years)</u> | <u>Post Mortem Time</u> | <u>Cause of Death</u>  | <u>CNS Diagnose</u>     |
|-------------------|------------|--------------------|-------------------------|------------------------|-------------------------|
| Healthy Control 1 | Male       | 80                 | 72h                     | AMI                    | -                       |
| Healthy Control 2 | Male       | 68                 | 24h                     | Cardiac Insuff         | -                       |
| Healthy Control 3 | Female     | 65                 | 24h                     | AMI                    | -                       |
| Healthy Control 4 | Female     | 86                 | 4 days                  | Aorta-diss. O rupture  | -                       |
| Healthy Control 5 | Male       | 75                 | 72h                     | AMI                    | -                       |
| AD patient 1      | Male       | 77                 | 48h                     | Pneumonia              | Alzheimer's Disease-FTD |
| AD Patient 2      | Male       | 82                 | 7 days                  | AMI+Septicemia         | Alzheimer's Disease     |
| AD Patient 3      | Male       | 63                 | 96h                     | Pulm Embolus           | Alzheimer's Disease     |
| AD Patient 4      | Male       | 76                 | 48h                     | Pneumonia + AMI        | Alzheimer's Disease     |
| AD Patient 5      | Male       | 80                 | 48h                     | Pneumonia + Car.Insuff | Alzheimer's Disease     |
| AD Patient 6      | Female     | 70                 | 4 days                  | Pneumonia + AMI        | Alzheimer's Disease     |

\*AMI = *Acute Myocardial Infarction*. Patients and healthy controls were used to evaluate the inflammatory component (IL6), the levels of Gal3 and amyloid beta by western blot and ELISA.
