# Supplementary material for: Galectin-3, a novel endogenous TREM2 ligand, detrimentally regulates inflammatory response in Alzheimer’s disease
Source: Springer Nature journal article supplement (doi:10.1007/s00401-019-02013-z), 2019-04-20
Supplement: MOESM10 [file 16666668]

| CHR | BP       | SNP        | A1 | A2 | N | P     | P(R)  | OR   | OR(R) | Q      | I    | ADNI | INIA | GENADA | MUR  |
|-----|----------|------------|----|----|---|-------|-------|------|-------|--------|------|------|------|--------|------|
| 14  | 54674789 | rs4652     | C  | A  | 3 | 0.022 | 0.022 | 1.11 | 1.11  | 0.4455 | 0.00 | 1.33 | 1.13 | 1.07   | NI   |
| 14  | 54677119 | rs8004787  | T  | C  | 3 | 0.027 | 0.023 | 1.10 | 1.11  | 0.4418 | 0.00 | 1.33 | 1.10 | 1.07   | NI   |
| 14  | 54678987 | rs2075601  | T  | C  | 3 | 0.022 | 0.022 | 1.11 | 1.11  | 0.4455 | 0.00 | 1.33 | 1.11 | 1.07   | NI   |
| 14  | 54679527 | rs2075602  | G  | A  | 3 | 0.027 | 0.023 | 1.10 | 1.11  | 0.4418 | 0.00 | 1.33 | 1.10 | 1.07   | NI   |
| 14  | 54682233 | rs10498475 | T  | C  | 3 | 0.018 | 0.018 | 1.27 | 1.23  | 0.4896 | 0.00 | 0.96 | 1.25 | NI     | 1.51 |

CHR, chromosome; BP, base pair position; SNP, single nucleotide polymorphism; A1, reference allele; A2, alternative allele; N, number of GWAS included in the meta-analysis; p, fixed-effects p-value; p (R), random-effects p-value; OR, fixed-effects odds ratio; OR (R), random-effects odds ratio; Q, p-value for heterogeneity of OR; I, effect size for heterogeneity of OR. The last four columns show the OR for each GWAS.
